# Supplementary material for: Enhancing the photovoltaic performance of triphenylamine based star-shaped molecules by tuning the moiety sequence of their arms in organic solar cells
Source: Royal Society of Chemistry journal article supplement (doi:10.1039/c5ta02728d), 2015-01-01

## Supporting Information

### **To enhance photovoltaic performance of the triphenylamine based star-shaped molecules by tuning the moiety sequence of their arms in organic solar cells**

Pei Zhou,<sup>a†</sup> Dongfeng Dang,<sup>a†</sup> Qiong Wang,<sup>a</sup> Xiongwei Duan,<sup>a</sup> Manjun Xiao,<sup>a,b</sup> Qiang  
Tao,<sup>a</sup> Hua Tan,<sup>a</sup> Renqiang Yang,<sup>b</sup> Weiguo Zhu<sup>a\*</sup>

<sup>a</sup> Department of Chemistry, Key Lab of Environment-Friendly Chemistry and  
Application in the Ministry of Education, Xiangtan University, Xiangtan 411105, P. R.  
China

<sup>b</sup> Qingdao Institute of Bioenergy and Bioprocess Technology, Chinese Academy of  
Sciences, Qingdao 266101, P. R. China

Corresponding author: Prof. Weiguo Zhu

Tel: +86-731-58293377

Fax: +86-731-58292251

E-mail addresses: zhuwg18@126.com

<sup>†</sup> P. Zhou and D. F. Dang contributed equally to this work.

**Fig S1: The UV-Vis spectra of the blending films based on SMs and PC<sub>71</sub>BM.**

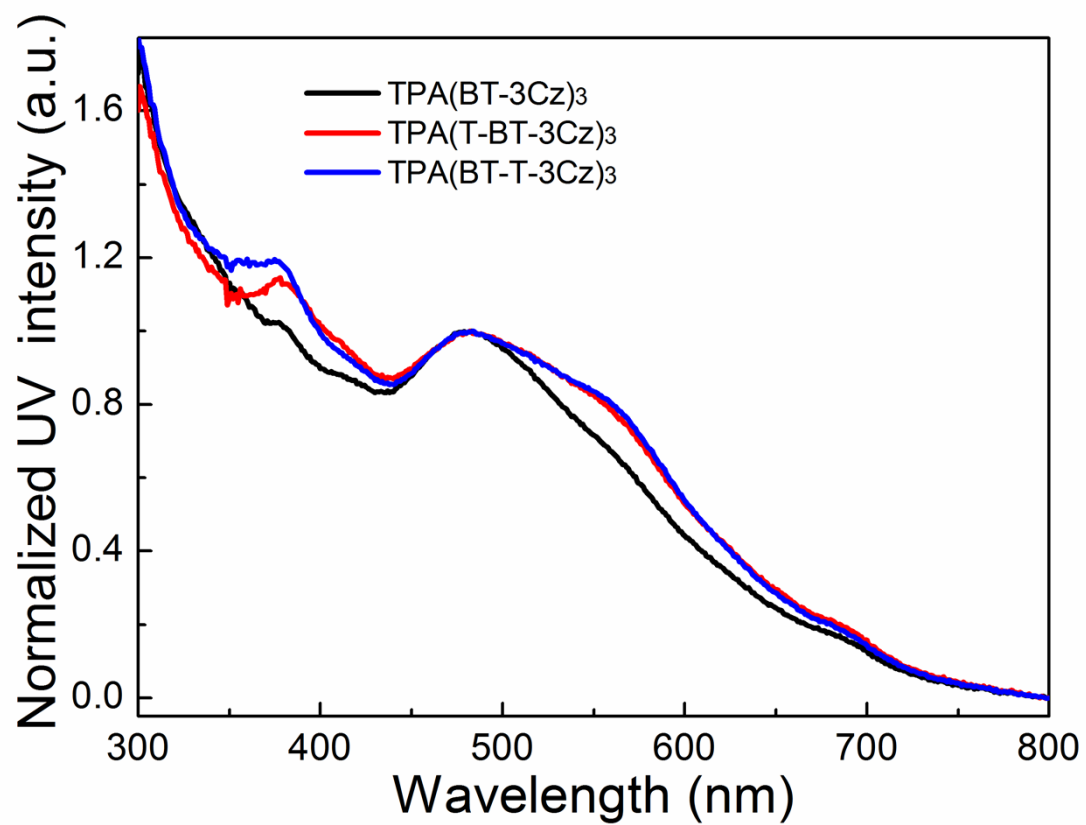



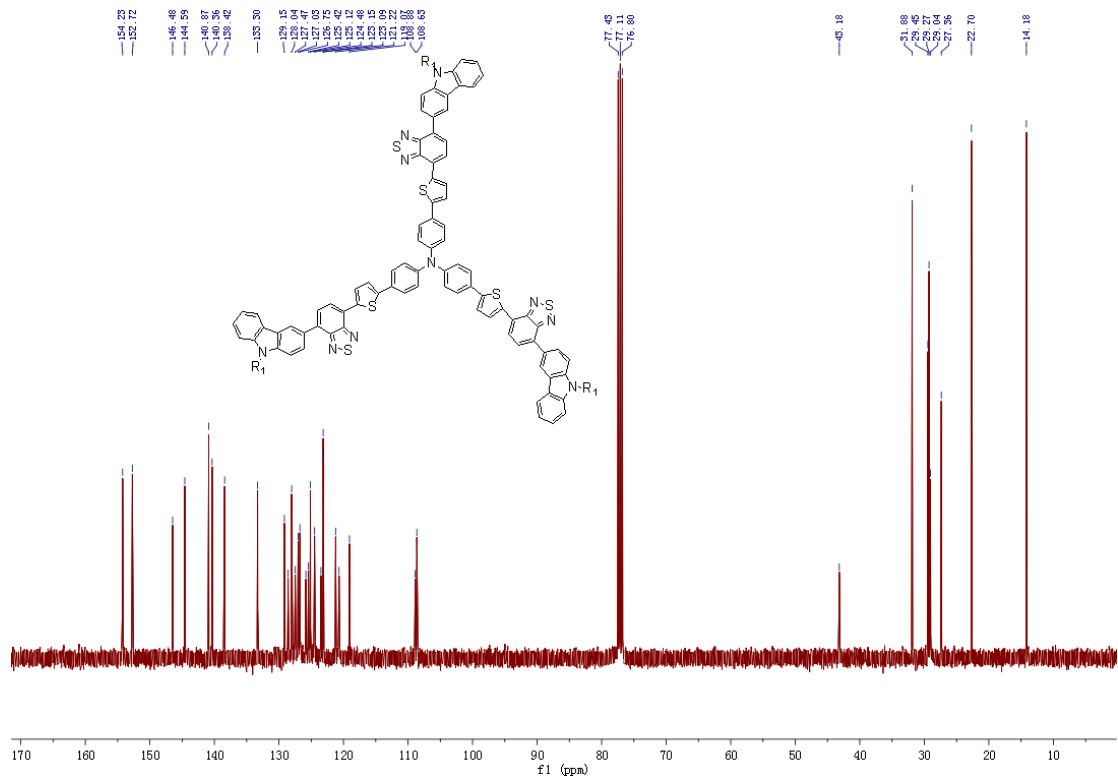

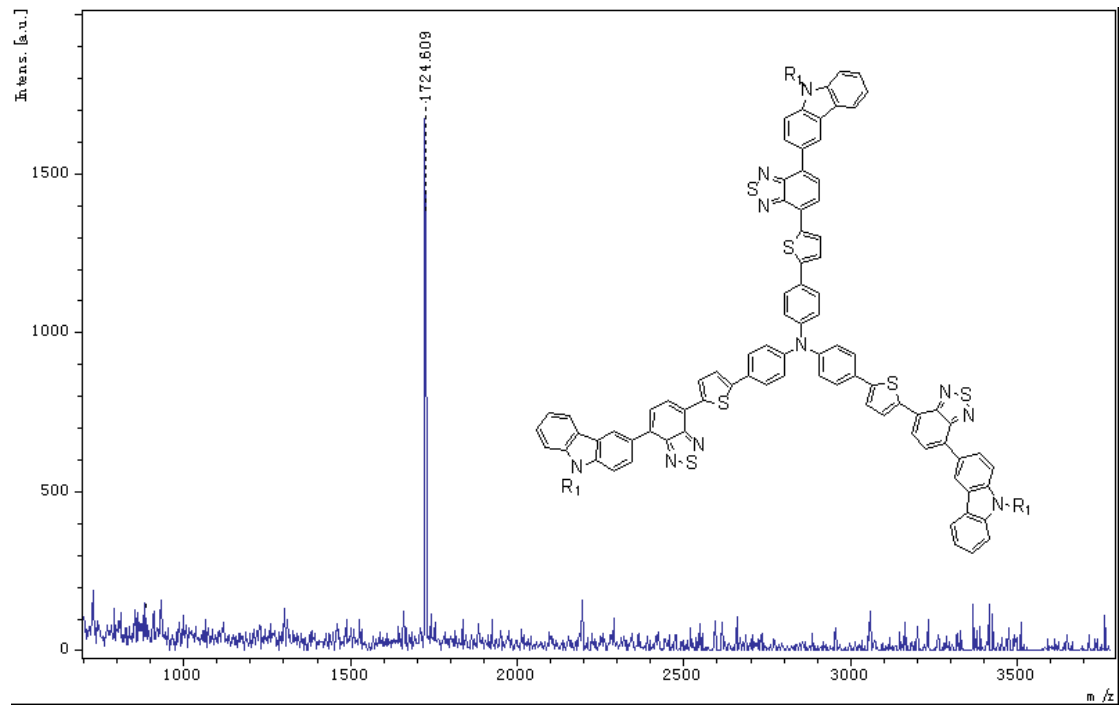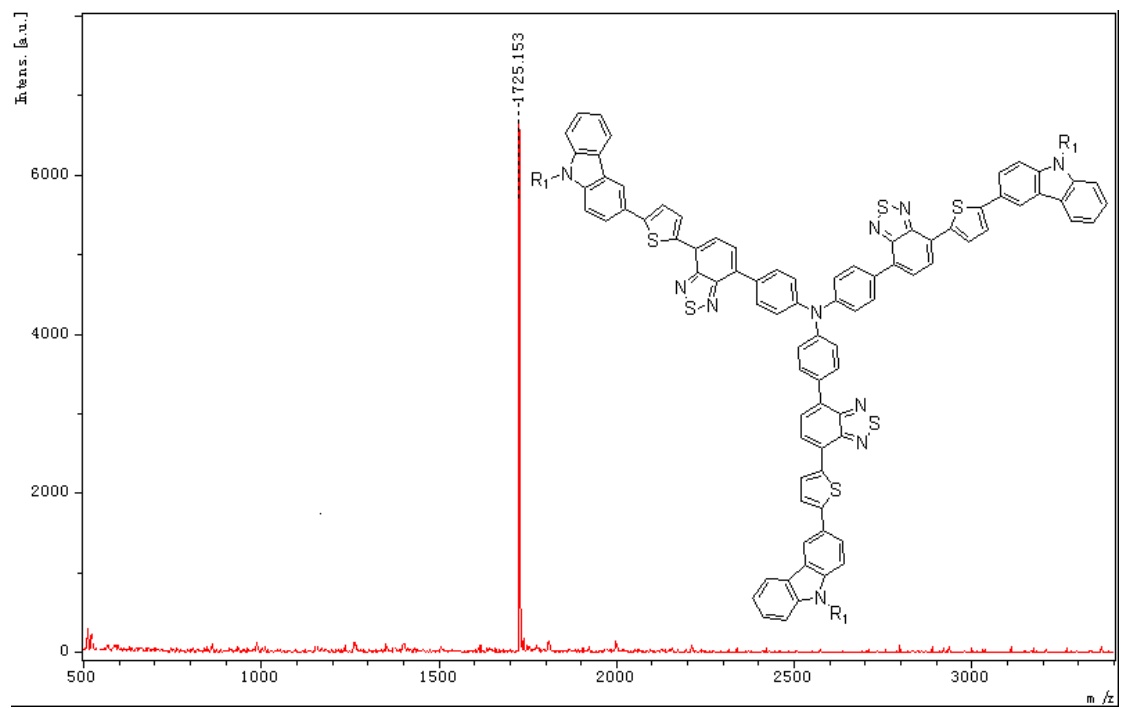

Supplement: c5ta02728d1.pdf [file c5ta02728d1.pdf]
